# Supplementary material
Source: PubMed Central journal article supplement (PMC8013159)
Supplement: 2439_table.pdf [file 2439_table.pdf]

**On-line Table: Clinical presentation and functional outcome after endovascular therapy**

| Case | Age (yr) | Sex | Localization                                | Signs/Symptoms at Presentation                                                                                            | Signs/Symptoms after Treatment                                                                      | Clinical Complications                                                               |
|------|----------|-----|---------------------------------------------|---------------------------------------------------------------------------------------------------------------------------|-----------------------------------------------------------------------------------------------------|--------------------------------------------------------------------------------------|
| 1    | 6        | F   | L nasal AVM                                 | Facial stain over L cheek, L upper and lower eyelid, severe episodic epistaxis, chronic anemia                            | No bleeding for 1 year following embolization, then intermittent self-limited episodes of epistaxis | None                                                                                 |
| 2    | 10       | F   | R maxillary AVM                             | Soft-tissue swelling, recurrent bleeding from around R maxillary deciduous canine after 2 embolizations using alcohol     | No recurrent bleeding                                                                               | None                                                                                 |
| 3    | 11       | M   | L upper lip AVM                             | L upper lip prominence, discoloration, palpable arterial thrill, progressive enlargement                                  | Regression                                                                                          | None                                                                                 |
| 4    | 12       | F   | L > R perimandibular AVM                    | Soft-tissue overgrowth with overlying skin discoloration, progressive enlargement                                         | Regression                                                                                          | None                                                                                 |
| 5    | 12       | M   | L = R mandibular and floor of the mouth AVM | Facial prominence, recurrent gingival bleeding, <i>PTEN</i> mutation, previous embolizations with PVA particles and coils | Regression, intermittent spotting from gums                                                         | Temporary loss of sensation in R lower teeth, completely resolved within weeks       |
| 6    | 13       | M   | R STA AVF                                   | Pulsatile mass with thrill at R temple after trauma                                                                       | No thrill                                                                                           | None                                                                                 |
| 7    | 14       | F   | R maxillary AVM                             | Asymmetric swelling and discoloration of R upper lip                                                                      | Regression                                                                                          | None                                                                                 |
| 8    | 15       | F   | R scalp AVM                                 | Scalp prominence, spontaneous bleeding                                                                                    | No hemorrhage since 1st session                                                                     | None                                                                                 |
| 9    | 16       | M   | L mandibular AVM                            | Perimandibular swelling and pain, recurrent bleeding from mouth                                                           | Spotting after 1st and 6th embolizations, less mass effect                                          | Significant pain, slight swelling, perioral numbness after 1st and 4th embolizations |
| 10   | 21       | F   | R facial AVM                                | R facial prominence and <i>PTEN</i> mutation                                                                              | Regression                                                                                          | None                                                                                 |
| 11   | 22       | M   | L facial AVM                                | L facial prominence, recurrent epistaxis, and <i>PTEN</i> mutation                                                        | Less frequent episodes of epistaxis                                                                 | Epistaxis, numbness, swelling                                                        |
| 12   | 23       | M   | L facial-auricular AVM                      | L necrotic and secondarily infected ear, recurrent bleeding                                                               | Improved healing after 3 embolizations                                                              | None                                                                                 |
| 13   | 26       | M   | Forehead AVM                                | Soft pulsatile swelling, increasing in size                                                                               | Regression                                                                                          | None                                                                                 |
| 14   | 27       | F   | L = R facial AVM                            | Coil protrusion, infection and tongue necrosis after previous embolizations requiring partial resection of tongue         | Markedly improved pain                                                                              | None                                                                                 |
| 15   | 28       | M   | Nasal AVM                                   | Recurrent episodes of epistaxis, palpable thrill over nose                                                                | Less frequent episodes of epistaxis                                                                 | None                                                                                 |
| 16   | 28       | M   | R facial AVM                                | Skin discoloration, protuberant mass, explosive bleeding, decreased vision                                                | Regression                                                                                          | Swelling                                                                             |
| 17   | 29       | M   | L facial artery laceration                  | Life-threatening oral bleeding                                                                                            | No recurrent hemorrhage                                                                             | None                                                                                 |
| 18   | 38       | M   | L neck and facial AVF                       | Gunshot wound to L ear with subsequent fistula for which LECA was ligated                                                 | Shrinkage of temporal and periorbital component                                                     | None                                                                                 |
| 19   | 43       | F   | L posterior auricular AVF                   | Growing L facial soft-tissue prominence, L tinnitus                                                                       | No symptoms                                                                                         | None                                                                                 |
| 20   | 43       | F   | R chin AVM                                  | Skin stain on R chin, progressive enlargement and pulsatility during pregnancy                                            | Regression                                                                                          | None                                                                                 |
| 21   | 53       | M   | L nasal/cheek/periorbital AVM               | Chronic epistaxis requiring transfusions                                                                                  | Episodic focal bleeding from skin over nose, less pain                                              | Stretched coil in 1st, facial swelling after 4th and 5th sessions                    |
| 22   | 65       | M   | R floor of the mouth AVM                    | Difficulty swallowing and choking sensation, prior alcohol embolization                                                   | Persistent symptoms                                                                                 | None                                                                                 |
